# Supplementary material for: Enhanced quantum yield of nitrogen fixation for hydrogen storage with in situ-formed carbonaceous radicals
Source: Royal Society of Chemistry journal article supplement (doi:10.1039/c5cc00589b), 2015-01-01
Supplement: c5cc00589b1.pdf [file c5cc00589b1.pdf]

## Supporting Information

### Enhanced Quantum Yield of Nitrogen Fixation for Hydrogen Storage with In-Situ-Formed Carbonaceous Radicals

Weirong Zhao\*, Haiping Xi, Meng Zhang, Yajun Li, Jinsheng Chen, Jing Zhang, and Xi Zhu

Department of Environmental Engineering, Zhejiang University, 866 Yu Hang Tang Road, Hangzhou

310058, China

#### 1. Experimental details

##### Materials

5,5-Dimethyl-1-pyrroline N-oxide (DMPO, GR) and 2,9-dimethyl-1,10-phenanthroline (DMP, AR) are purchased from Sigma Chemicals (America). All other chemicals used here are of analytical grade and purchased from Sinopharm Chemicals (China). The chemicals are used as received.

$\beta$ -Ga<sub>2</sub>O<sub>3</sub> is prepared using a method previously optimized in our laboratory with polyethylene glycol as a template.<sup>[1]</sup>

##### Activity test and methods

Nitrogen photofixation for hydrogen storage was carried out in a double walled cylindrical quartz reactor with a water circulation facility. 0.1 g of nanostructured  $\beta$ -Ga<sub>2</sub>O<sub>3</sub> was mixed with 100 mL of solution containing 0.02 mol L<sup>-1</sup> hole scavengers. Methanol, ethanol, *n*-propanol, *n*-butanol, and *t*-butanol (TBA) were chosen as hole scavengers, respectively. The mixture was stirred homogeneously in dark and then irradiated with photons from an 8 W UV lamp (254 nm). Samples were taken out every 30 min and filtered through a porous membrane (0.45  $\mu$ m).

To exclude the adsorption effect of  $\beta$ -Ga<sub>2</sub>O<sub>3</sub>, a certain concentration of NH<sub>3</sub>•H<sub>2</sub>O was added to the

100 mL mixture and stirred without illumination and sampled every 30 min to track changes of NH<sub>3</sub> concentration. To study the effect of different atmosphere, the mixture with 0.02 mol L<sup>-1</sup> TBA was purged with different gases (4:1 N<sub>2</sub>/O<sub>2</sub>, or 4:1 N<sub>2</sub>/Ar) for 2 h and sealed.

The concentration of NH<sub>3</sub>, NO<sub>3</sub><sup>-</sup>, NO<sub>2</sub><sup>-</sup>, N<sub>2</sub>H<sub>4</sub>, and H<sub>2</sub>O<sub>2</sub> was determined colorimetrically by a UV-Vis spectrophotometer (TU-1901, China) with a precision of ± 5%. NH<sub>3</sub> was detected using Nessler's reagent as a chromogenic agent at 420 nm. NO<sub>2</sub><sup>-</sup> was detected using p-aminobenzene sulfonamide and *N*-(1-naphthyl) ethylenediamine dihydrochloride at 540 nm. N<sub>2</sub>H<sub>4</sub> was detected using 4-Dimethylaminobenzaldehyde at 458 nm. H<sub>2</sub>O<sub>2</sub> was detected using copper(II) ion and 2,9-dimethyl-1,10-phenanthroline (DMP) under 454 nm. NO<sub>3</sub><sup>-</sup> was determined by dual wavelength spectrophotometry at 220 and 275 nm, respectively.

It is worth mentioning that blank experiments in the absence of β-Ga<sub>2</sub>O<sub>3</sub>, hole scavengers or UV source were also performed and no ammonia was detected, and that adsorption capacity of the catalyst for ammonia was essentially negligible (Data not shown), and that no NO<sub>3</sub><sup>-</sup> or NO<sub>2</sub><sup>-</sup> was detected within 3 h. The concentration of ammonia detected in solution could represent the total amount that produced from N<sub>2</sub> in the systems.

The quantum yield was calculated as follow:<sup>[2]</sup>

$$\phi = \frac{3k}{I} \quad (S1)$$

Where *k* is the generation rate of NH<sub>3</sub>, *I* is the absorption rate of photo-generated electrons, which is 7.06 × 10<sup>-6</sup> Einstein s<sup>-1</sup> measured by a UV meter (ST-512, China) and corrected with permanganometric method.

## Characterizations

**Mott-Schottky plot** was recorded with a three-electrode electrochemical analyzer system (CHI650D, China). The electrolytic solution was composed of 0.4 mol L<sup>-1</sup> KNO<sub>3</sub> and 5 × 10<sup>-6</sup> mol L<sup>-1</sup> of K<sub>3</sub>[Fe(CN)<sub>6</sub>]. Before the test, the solution was purged with pure N<sub>2</sub> for 15 min to remove oxygen. Mott-Schottky equation is as follow:<sup>[2-3]</sup>

$$C^{-2} = \left( \frac{2}{\varepsilon \varepsilon_0 q N_d} \right) \left( E - V_{fb} - \frac{kT}{q} \right) \quad (S2)$$

Where  $q$  is the electric charge;  $\varepsilon$  is the dielectric constant of the  $\beta$ -Ga<sub>2</sub>O<sub>3</sub>;  $\varepsilon_0$  is the vacuum permittivity;  $k$  is Boltzmann's constant;  $V_{fb}$  is the flat band potential;  $N_d$  is the carriers in the semiconductors;  $E$  is the bias voltage relative to the reference electrode. Value of  $kT/q$  can be negligible. Therefore, we can obtain the flat band potential ( $V_{fb}$ ) from the x-axis intercept of the linear.

**ESR analysis** was conducted with a Bruker model spectrometer (A300, Germany) with UV light of 254 nm. The following was the settings: centre field, 3512.0 G; microwave frequency, 9.683 GHz; and power, 20.24 mW. DMPO was used as radical capture agent. ESR spectra of  $\beta$ -Ga<sub>2</sub>O<sub>3</sub> in dark and under UV were recorded. •OH is captured by 0.05 mol L<sup>-1</sup> DMPO using water as a solvent, while •O<sub>2</sub><sup>-</sup> is detected in methanol. •CO<sub>2</sub><sup>-</sup> in solutions with 0.02 mol L<sup>-1</sup> TBA or CH<sub>3</sub>OH as hole scavenger was captured by 0.8 mol L<sup>-1</sup> DMPO.

**Intermediate products** were determined with a nano-liquid-chromatography electrospray ionization quadrupole time-of-flight mass spectrometer (Q-TOF-MS, MS4-APIQSTAR). The following was the settings: entrance voltage, 2500 V; drying gas, 350 °C nitrogen; spray rate, 4 L min<sup>-1</sup>; injection volume, 50 µL; and injection flow rate, 25 µL min<sup>-1</sup>. All intermediates were tested under positive ion mode. The minimum detection limit was 5 amu. Q-TOF-MS spectra of samples after reaction of 3 h containing TBA were recorded.

**Density functional theory (DFT) calculations** were performed with CASTEP module of Materials Studio (Accelrys Inc.). (111) facets of  $\beta$ -Ga<sub>2</sub>O<sub>3</sub> were selected to build cells. And a 2×2 supercell was used as a calculation unit. A vacuum layer of 15 Å thicknesses was set above the crystal surface to prevent interactions between absorbed molecules and cell surface. GGA (the generalized gradient approximation) and PBE (Perdew, Burke, and Ernzerhof) were chosen as functions with a 340 eV energy cutoff and a  $2 \times 3 \times 1$  *k*-grid.

## 2. Figure and table supplement

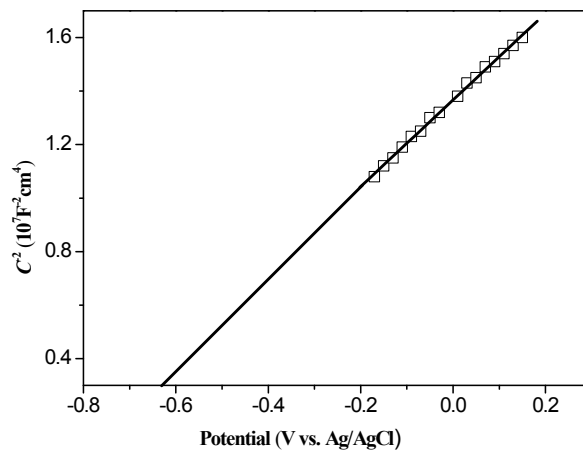

*Fig. S1* Mott-Schottky plot of  $\beta$ -Ga<sub>2</sub>O<sub>3</sub>.

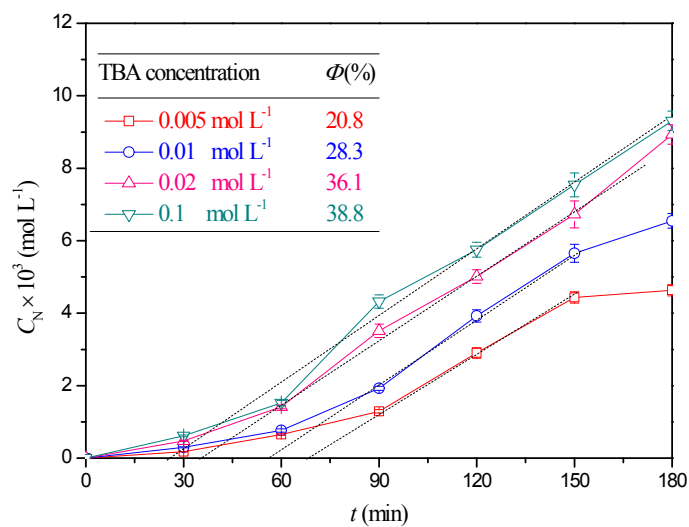

Fig. S2 Effect of TBA concentrations on photocatalytic hydrogen storage with  $\beta$ -Ga<sub>2</sub>O<sub>3</sub> under irradiation of 254 nm at pH 7 and 25 °C.

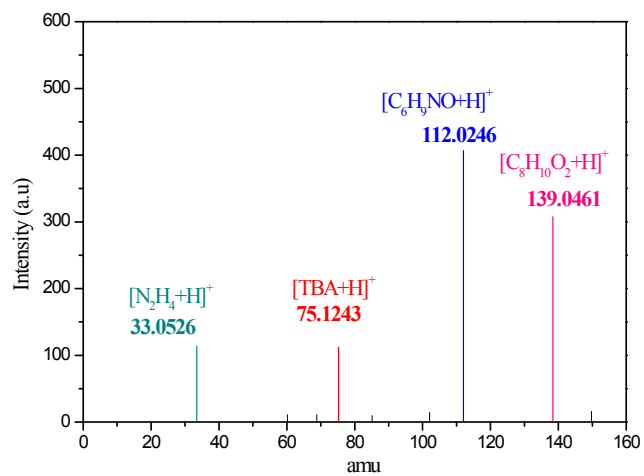

Fig. S3 Q-TOF-MS spectra of intermediates distribution in liquid sample after 3 h reaction.

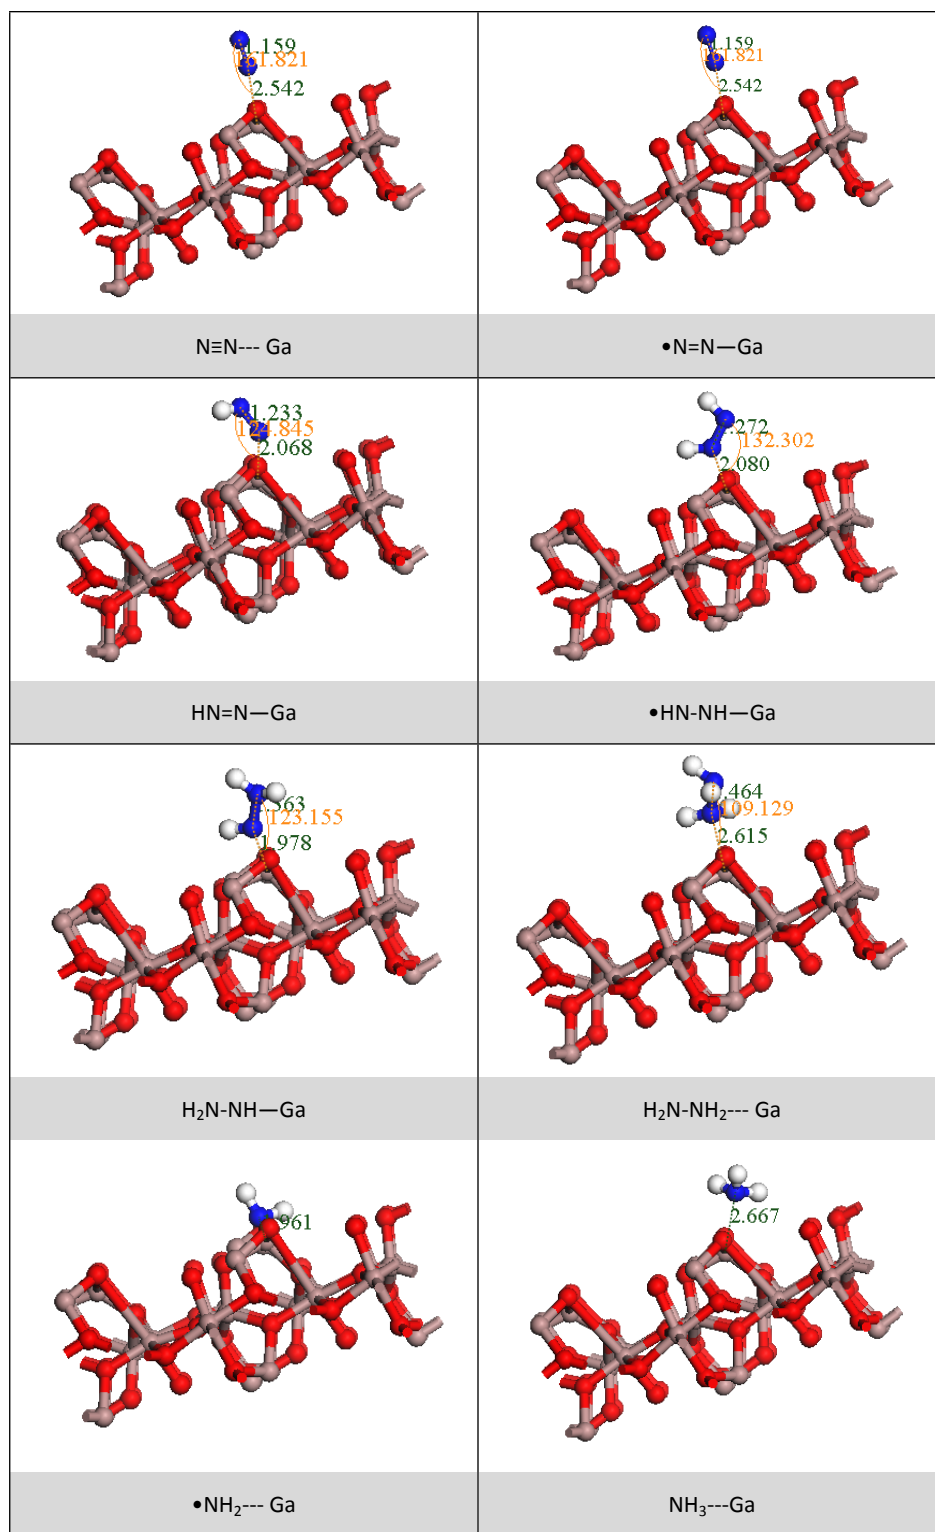

Fig. S4 Optimized structures of different adsorbate molecules calculated by DFT. Oxygen, red balls; gallium, pale pinkish grey balls; nitrogen, blue balls; and hydrogen, white balls.

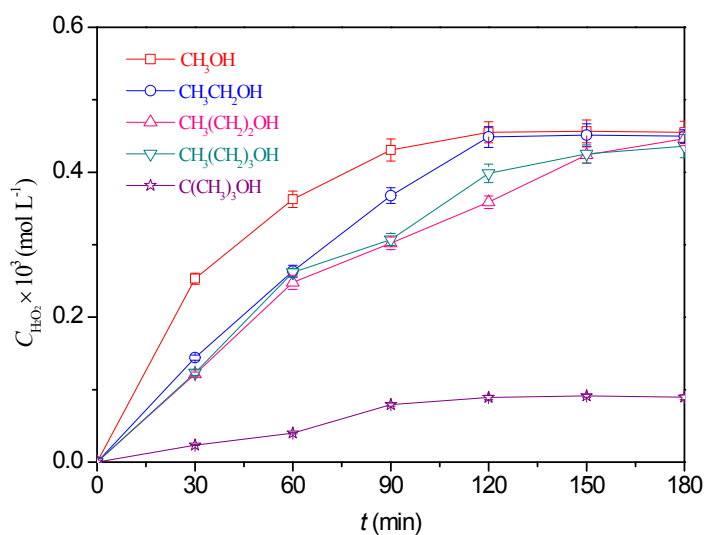

Fig. S5 Formation of H<sub>2</sub>O<sub>2</sub> in 100 mL 0.02 mol L<sup>-1</sup> alcohol hole scavengers under irradiation of 254 nm at pH 7 and 25 °C.

Table S1.  $E_{\text{HOMO}}$ , Quantum yield, and kinetic parameters with different hole scavengers

| Alcohol scavenger                                  | Molecular              | Quantum    | Turnover efficiency                      | Reaction rate                            |
|----------------------------------------------------|------------------------|------------|------------------------------------------|------------------------------------------|
|                                                    | orbital energy         | yield      | (TOF)                                    | $k(\text{NH}_3\text{-N})$                |
|                                                    | $E_{\text{HOMO}}$ (eV) | $\Phi$ (%) | ( $\mu\text{mol g}^{-1} \text{s}^{-1}$ ) | ( $\mu\text{mol L}^{-1} \text{s}^{-1}$ ) |
| CH <sub>3</sub> OH                                 | -13.776                | 12.5       | 2.95                                     | 0.295                                    |
| CH <sub>3</sub> CH <sub>2</sub> OH                 | -13.700                | 4.35       | 1.02                                     | 0.102                                    |
| CH <sub>3</sub> (CH <sub>2</sub> ) <sub>2</sub> OH | -13.698                | 3.19       | 0.752                                    | 0.0752                                   |
| CH <sub>3</sub> (CH <sub>2</sub> ) <sub>3</sub> OH | -13.696                | 2.10       | 0.493                                    | 0.0493                                   |
| C(CH <sub>3</sub> ) <sub>3</sub> OH                | -13.311                | 36.1       | 8.51                                     | 0.851                                    |

Table S2. Optimized structure parameters of different intermediate states of nitrogen fixation process on (111) facets of  $\beta$ -Ga<sub>2</sub>O<sub>3</sub>

| Mode                                   | N-Ga distance<br>(Å) | N-N distance<br>(Å) | N-N-Ga angle<br>(°) | Adsorption<br>energy $\Delta E$ (eV) |
|----------------------------------------|----------------------|---------------------|---------------------|--------------------------------------|
| N≡N---Ga                               | 2.542                | 1.159               | 161.821             | -0.975                               |
| •N=N—Ga                                | 2.542                | 1.159               | 161.821             | -0.975                               |
| HN=N—Ga                                | 2.068                | 1.233               | 124.845             | -1.848                               |
| •HN-NH—Ga                              | 2.08                 | 1.272               | 132.302             | -2.044                               |
| H <sub>2</sub> N-NH—Ga                 | 1.978                | 1.363               | 123.155             | -2.855                               |
| H <sub>2</sub> N-NH <sub>2</sub> ---Ga | 2.615                | 1.464               | 109.129             | -2.843                               |
| •NH <sub>2</sub> ---Ga                 | 1.961                |                     |                     | -5.104                               |
| NH <sub>3</sub> ---Ga                  | 2.667                |                     |                     | -2.525                               |

Reference:

- [1] W. Zhao, Y. Yang, R. Hao, F. Liu, Y. Wang, M. Tan, J. Tang, D. Ren, D. Zhao, *J. Hazard. Mater.* **2011**, *192*, 1548-1554.
- [2] W. Zhao, J. Zhang, X. Zhu, M. Zhang, J. Tang, M. Tan, Y. Wang, *Appl. Catal., B.* **2014**, *144*, 468-477.
- [3] J. Lv, T. Kako, Z. Li, Z. Zou, J. Ye, *J. Phys. Chem. C.* **2010**, *114*, 6157-6162.
